# Supplementary figures and images for: The clinical application value of the visceral fat area-to-hip circumference ratio in type 2 diabetes mellitus comorbidities
Source: Research Square preprint supplement (doi:10.21203/rs.3.rs-8588872/v1), 2026-02-11

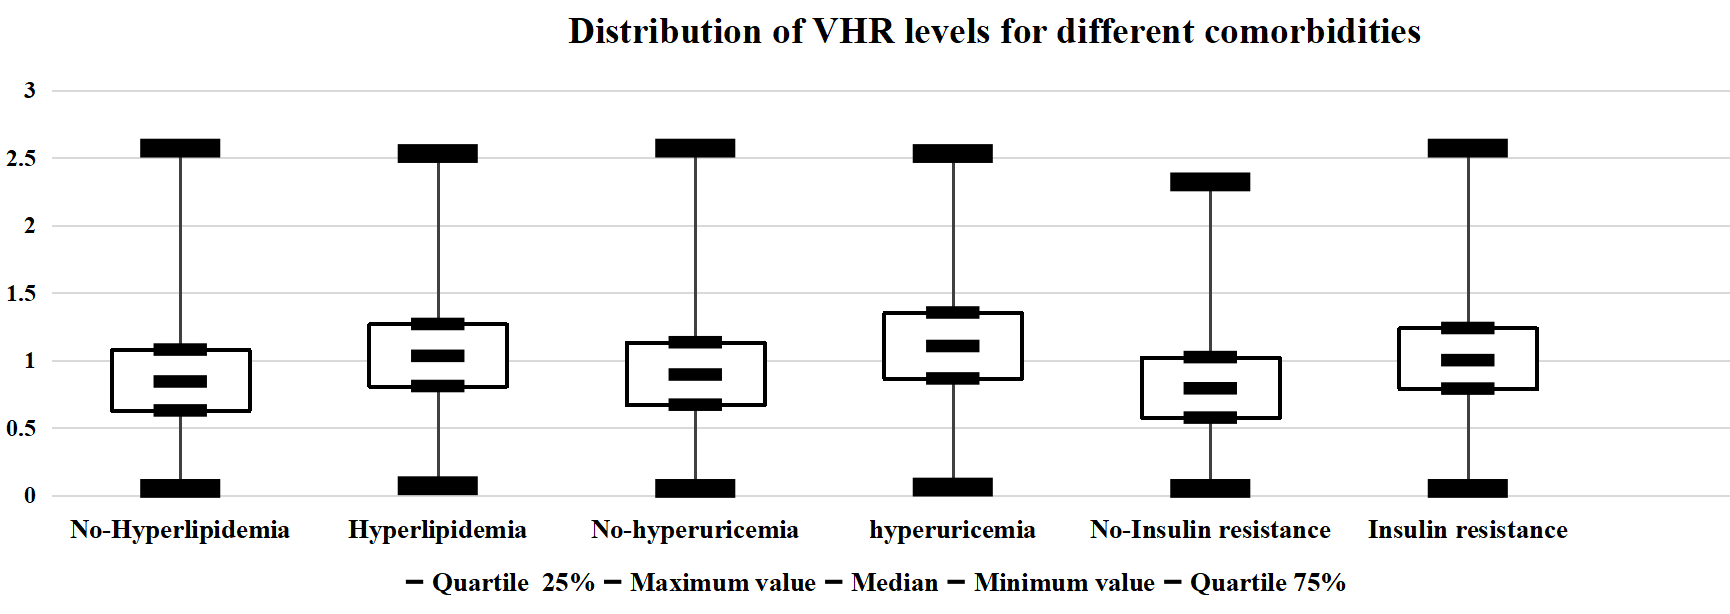


**Supplementary Figure 2. Distribution of VHR levels for different comorbidities**

Supplement: Supplementary file 1 [file 0b0ac8473be34358a200585d.docx]
